# Supplementary material for: Intrauterine exposure to low-dose DBP in the mice induces obesity in offspring via suppression of UCP1 mediated ER stress
Source: PubMed Central journal article supplement (PMC7529907; doi:10.1038/s41598-020-73477-3), 2020-10-01
Supplement: 41598_2020_73477_MOESM1_ESM.pdf [file 41598_2020_73477_MOESM1_ESM.pdf]

**Intrauterine exposure to low-dose DBP in the mice induces obesity in offspring via suppression of UCP1 mediated ER stress.**

Huan Li<sup>a#</sup>, Jianqiao Li<sup>a#</sup>, Zhenting Qu<sup>b</sup>, Honghao Qian<sup>a</sup>, Jing Zhang<sup>a</sup>, Hongyan Wang<sup>a</sup>, Xiaolei Xu<sup>a\*</sup>, Shengyuan Liu<sup>c\*</sup>

<sup>a</sup> School of Public Health, Beihua University, Jilin 132013, China;

<sup>b</sup>Jilin combine traditional Chinese and western hospital, Jilin 132012, China;

<sup>c</sup>Shenzhen Nanshan Center for Chronic Disease Control, Shenzhen 518054, China;

<sup>#</sup>These authors contributed equally to this work as the first author.

<sup>\*</sup>These authors contributed equally to this study as the last author.

**Corresponding author:**

To whom correspondence should be addressed. [liushenglb@126.com](mailto:liushenglb@126.com);

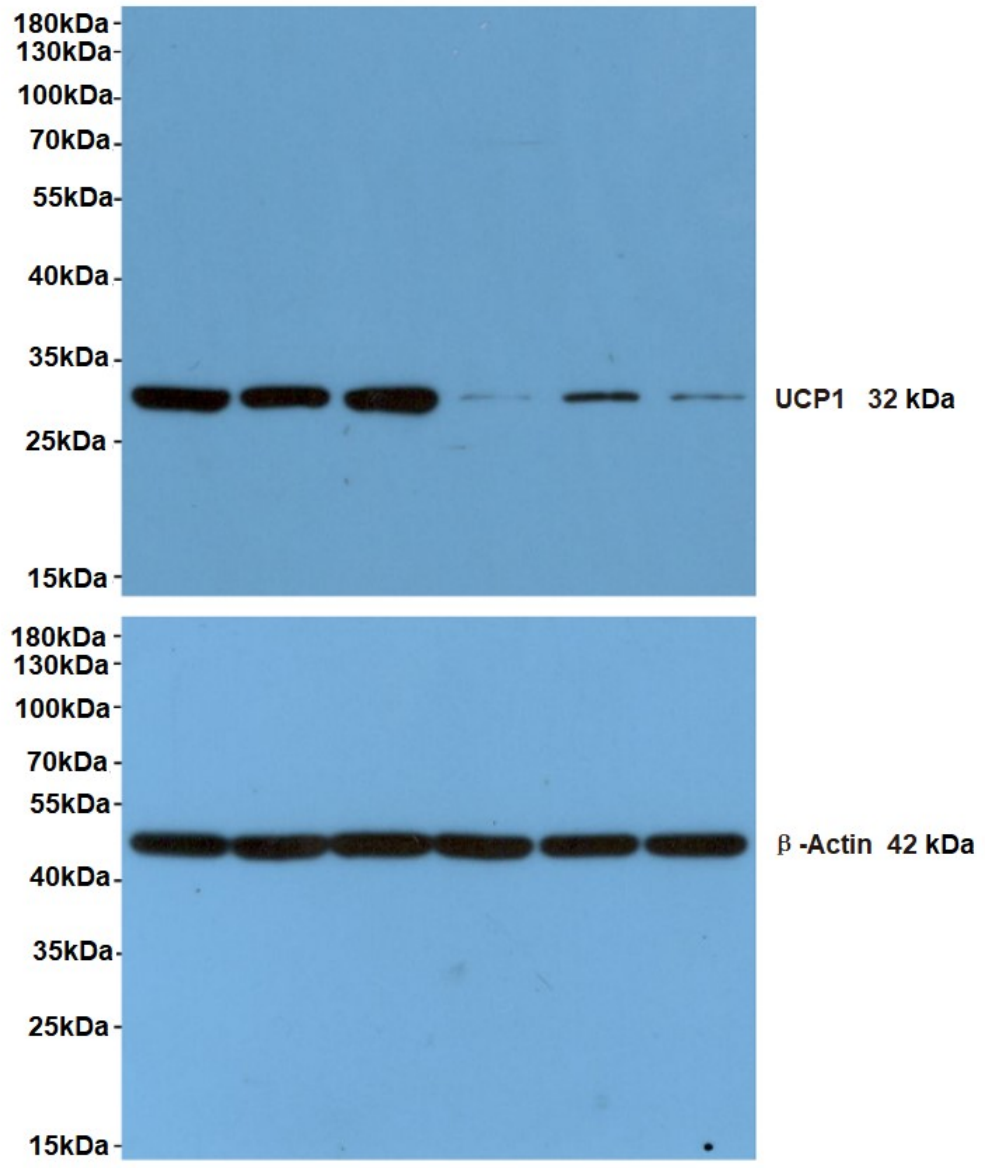

Figure S1: The full length western blots for the UCP1 proteins in Fig. 5.

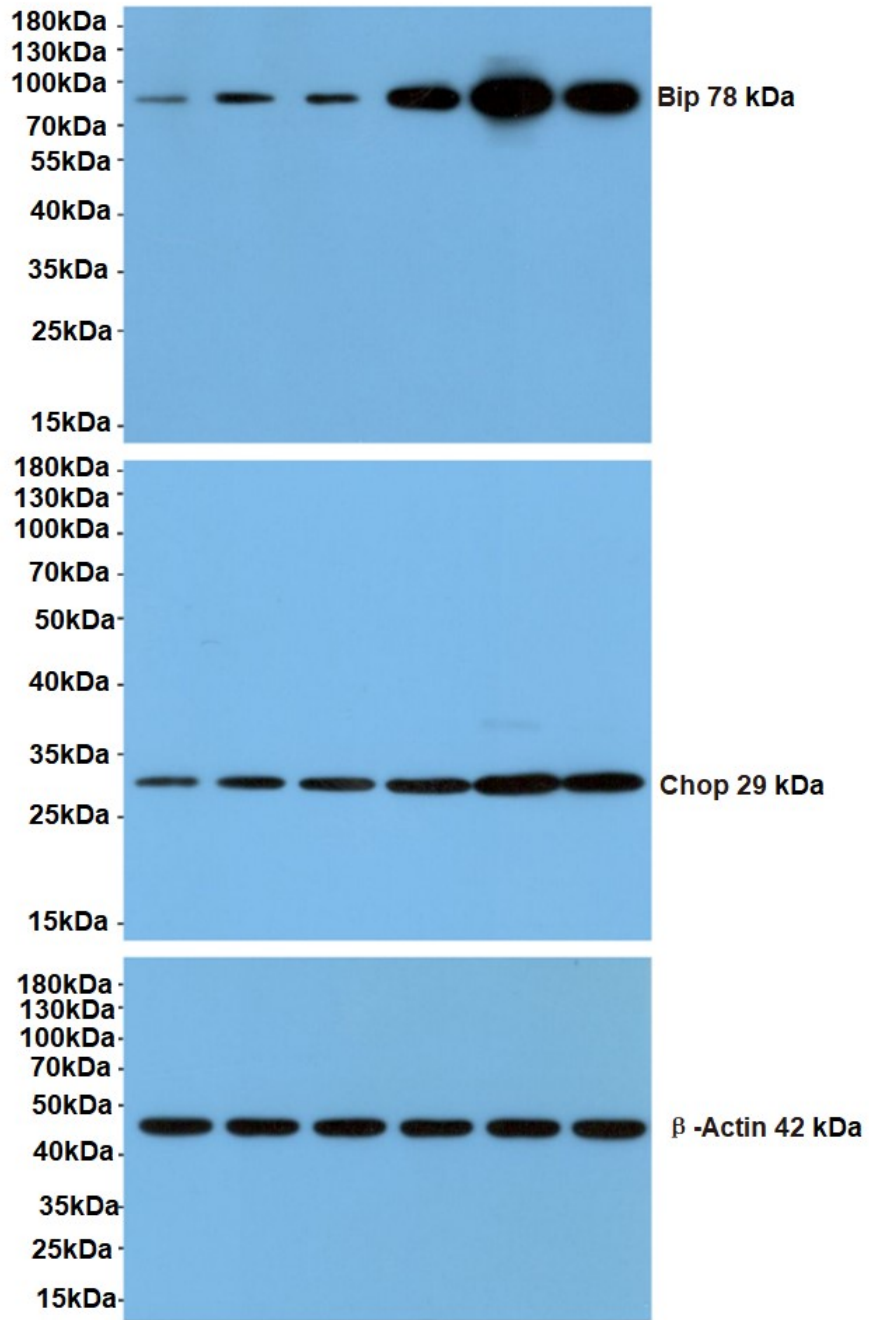

Figure S2: The full length western blots for the Bip and Chop proteins in Fig. 5.

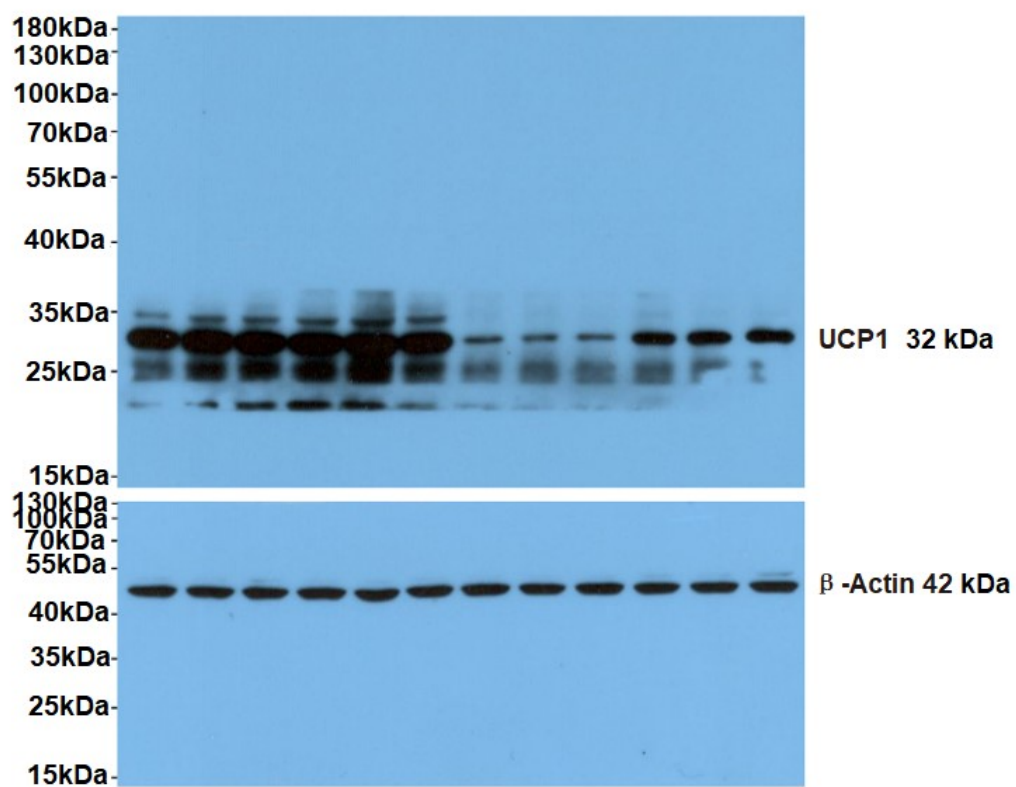

Figure S3: The full length western blots for the UCP1 proteins in Fig.6.
